# Supplementary material for: Effectiveness of Low Glycemic Index Diet Consultations Through a Diet Glycemic Assessment App Tool on Maternal and Neonatal Insulin Resistance: A Randomized Controlled Trial
Source: PubMed Central journal article supplement (PMC6503641; doi:10.2196/12081), 2019-04-18
Supplement: mhealth_v7i4e12081_app1.pdf [file mhealth_v7i4e12081_app1.pdf]

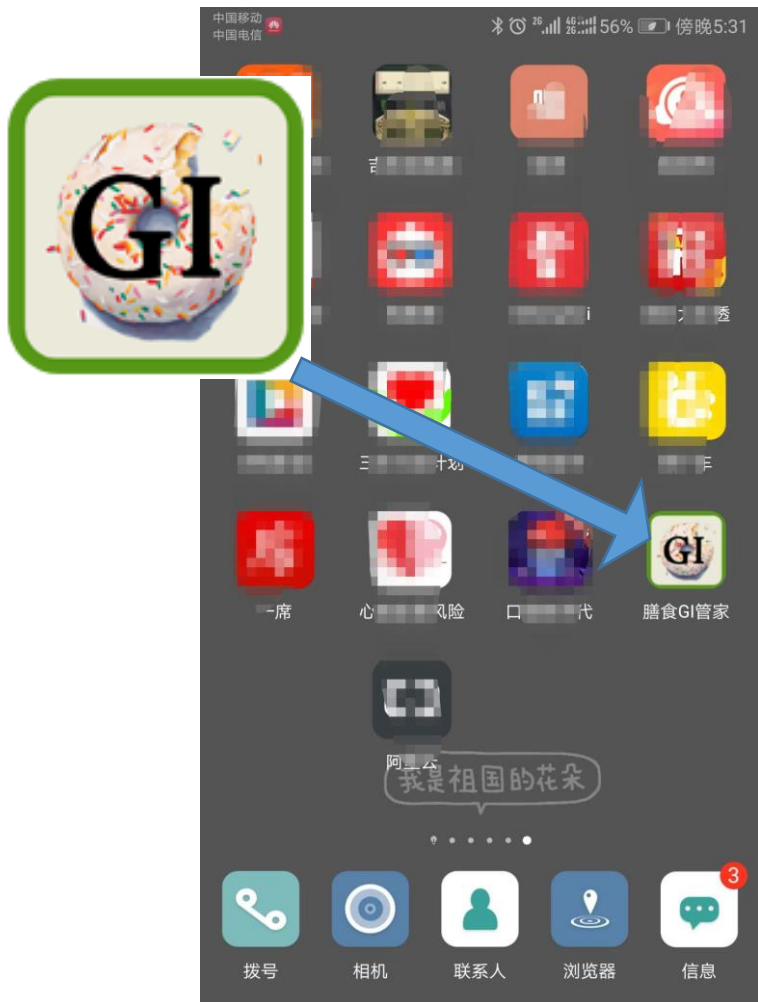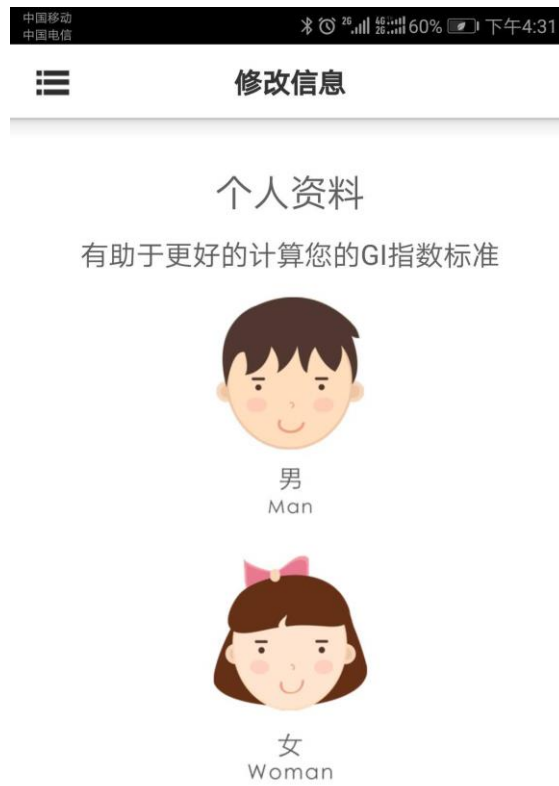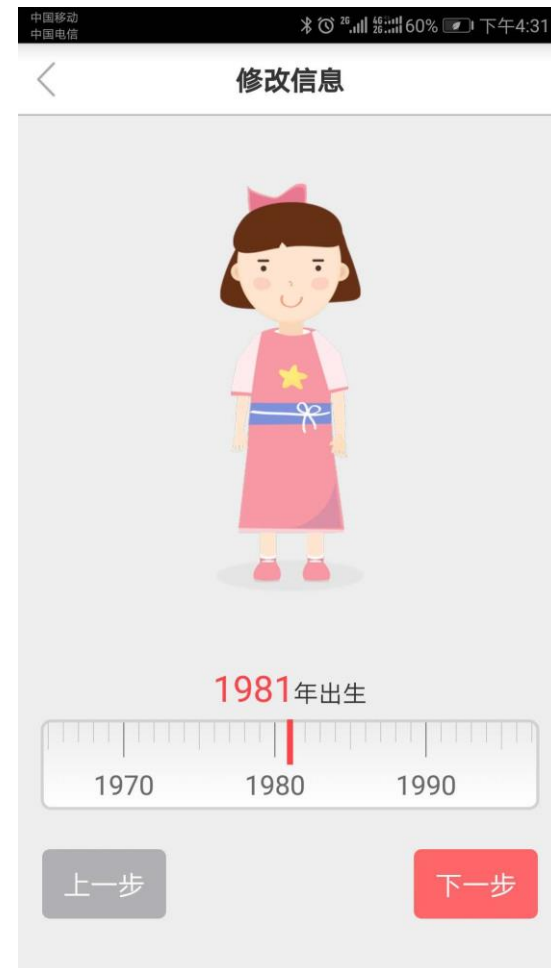

Enter personal information

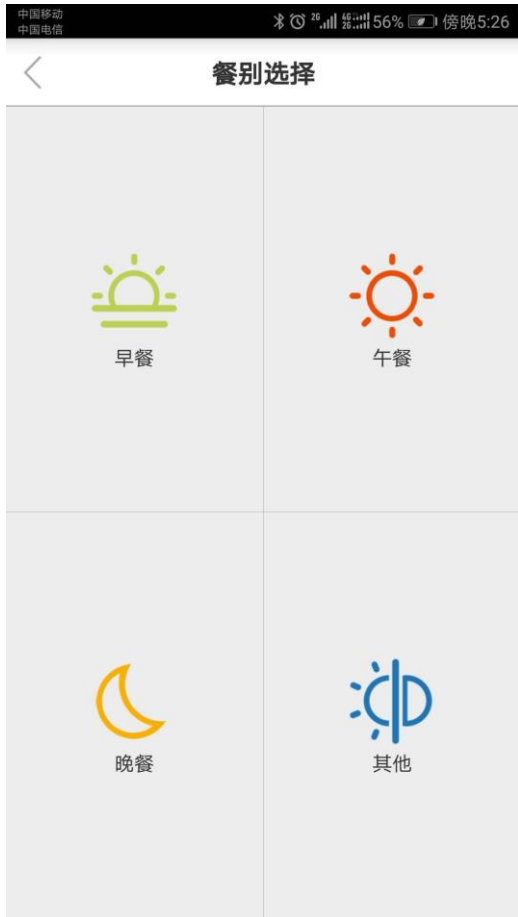

Select your  
breakfast/lunch/supper/snacks

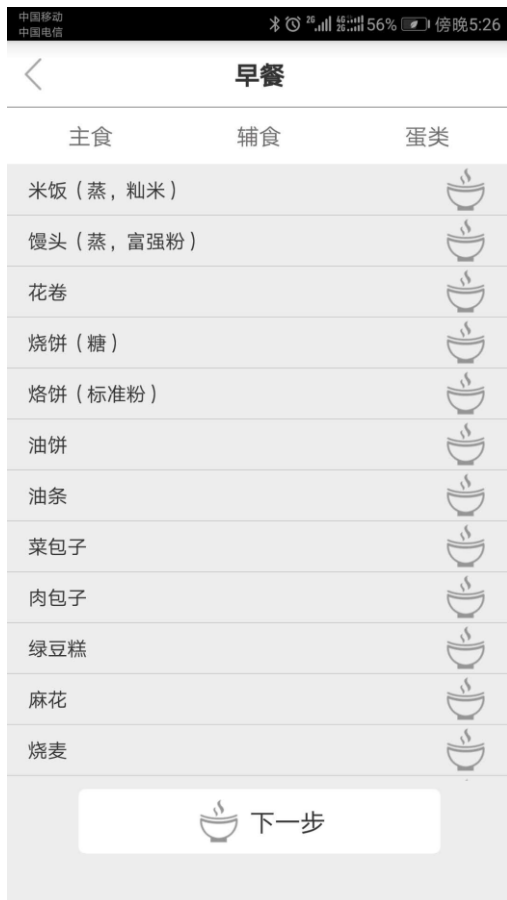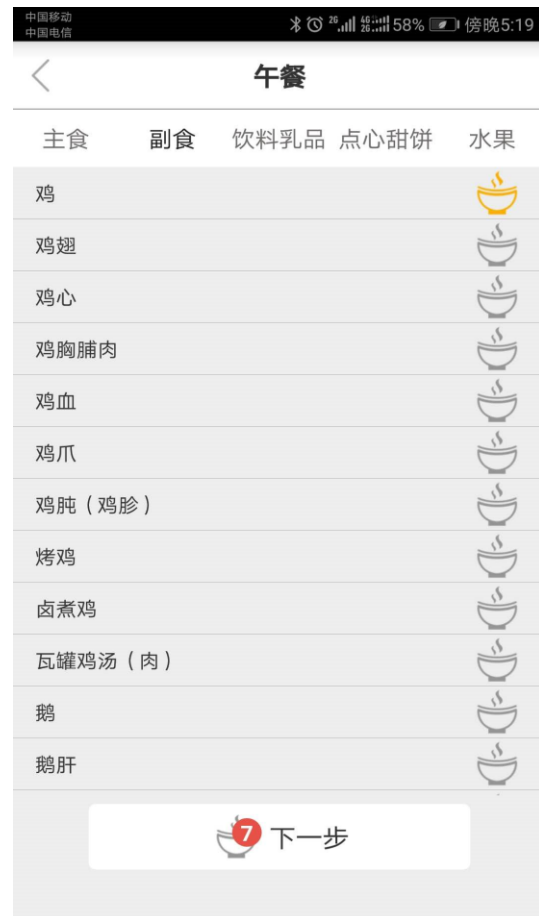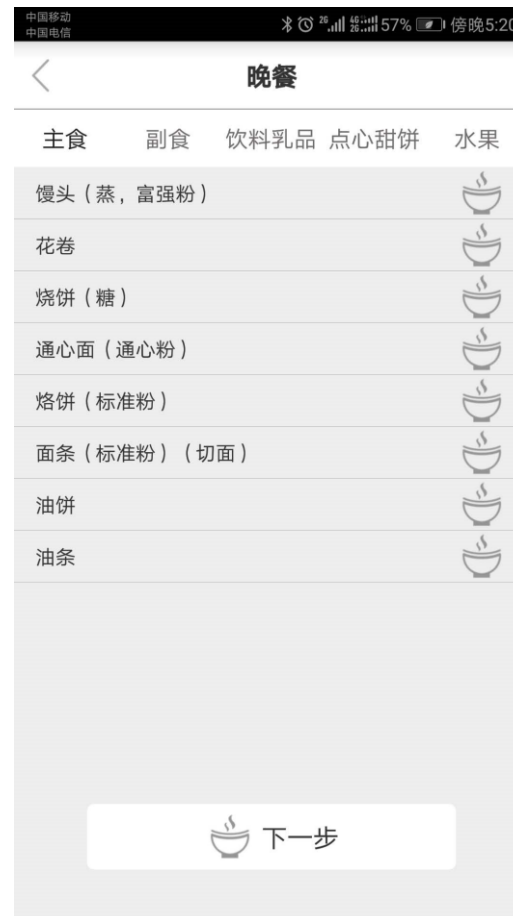

Input the type  
and amount of  
food intake

中国移动 中国电信 57% 傍晚5:21

### 详细信息

|    | 总GI<br>gi | 能量<br>kcal | 蛋白质<br>g | 脂肪<br>g | 碳水化合物<br>g |
|----|-----------|------------|----------|---------|------------|
| 早餐 | 77.2      | 366.4      | 19.7     | 7.8     | 54.6       |
| 午餐 | 32.3      | 1092.4     | 54.2     | 45.8    | 114.8      |
| 晚餐 | 79.2      | 443.1      | 15.7     | 2.6     | 90.0       |
| 其他 | 0.0       | 0.0        | 0.0      | 0.0     | 0.0        |

中国移动 中国电信 57% 傍晚5:21

### 结果&建议

**58.0**  
GI膳食指数

Kcal 总能量 PR 蛋白质 Fat 脂肪 CHO 碳水化合物  
1901.9 kcal 89.6 g 56.2 g 259.4 g

餐饮评估建议

您的饮食GI属于中等水平；尽量避免高GI主食！

详细信息 继续评估

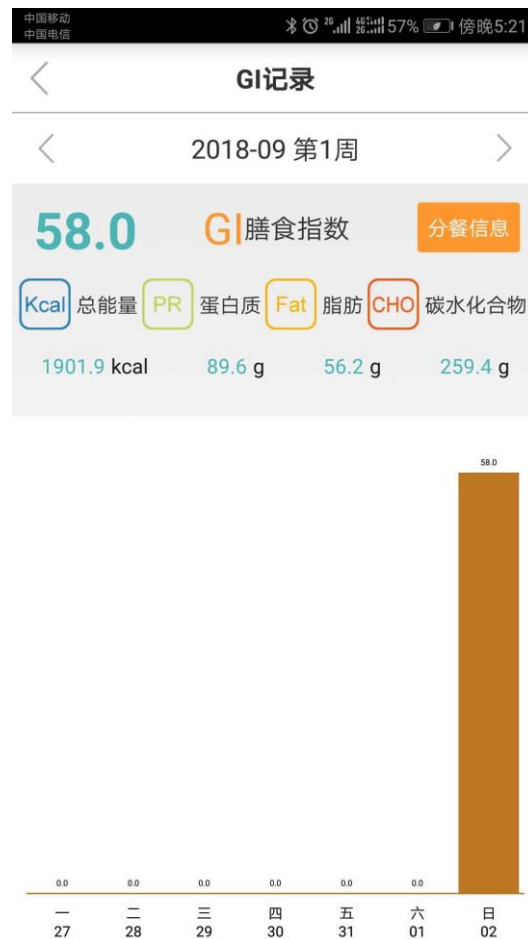

Calculate and output
